# Supplementary material for: The formation and evolution of Titan’s winter polar vortex
Source: Nat Commun. 2017 Nov 21;8:1586. doi: 10.1038/s41467-017-01839-z (PMC5698511; doi:10.1038/s41467-017-01839-z)
Supplement: Supplementary file 2 — Supplementary Dataset 1 [file 41467_2017_1839_MOESM2_ESM.xlsx]

## Sheet: Sheet1
Supplementary data 1
Obs. Date	Year	Orbit	Res.	Obs. Type	Latitude			Alt. Range	FOV	N
			(cm-1)		(degrees N)			(km)	(km)
2010-01-13	2010.04	124	14.2	MIRLMBMAP	-84.1	to	0.8	142-600	41.7	207-296
2010-06-04	2010.43	132	14.2	MIRLMBMAP	-85.9	to	-1.1	150-600	44.2	362-625
2011-06-20	2011.47	149	13.5	MIRLMBMAP	-83.4	to	0.9	149-600	41.9	390-576
2012-02-19	2012.14	161	14.3	MIRLMBMAP	-78.5	to	0.9	150-600	42.5	421-588
2015-03-16	2015.21	213	14.3	MIRLMBMAP	-84.1	to	-29.1	149-600	41.1	479-681
2015-09-28	2015.75	222	14.3	MIRLMBMAP	-84	to	-18.4	148-600	42.3	252-414
2016-01-16	2016.05	230	14.3	MIRLMBMAP	-84	to	-23.4	149-600	41.9	464-751
2017-05-24	2017.4	275	14.3	MIRLMBMAP	-78.3	to	-22.8	140-600	65.9	421-520
2010-01-12	2010.04	124	0.48	MIRLMBINT	-74			161-550	40.8	844
2011-09-11	2011.7	153	0.48	MIRLMBINT	-86.3			142-526	42.2	836
2015-03-16	2015.21	213	0.48	MIRLMBINT	-78.7			143-540	41.1	912
2015-09-29	2015.75	222	0.48	MIRLMBINT	-86.2			141-528	40.5	819
2016-01-31	2016.09	231	0.48	MIRLMBINT	-85.9			141-550	40.8	852
2016-02-16	2016.14	232	0.48	MIRLMBINT	-79.8			147-547	43.3	853
Cassini/CIRS limb mapping and integration observations.
Latitude refers to the tangent point.
Alt. Range is the portion of the observation used for temperature and composition retrievals.
Altitudes above 600km have too low signal-to-noise, whereas atmospheric opacity is too great to probe altitudes below 150 km.
FOV is the field of view projected diameter of the individual FP3/4 pixels on Titan's limb.
Limb mapping observations typically map at 5 degree latitude intervals. N is the number of spectra observed at each latitude.
