# Supplementary material for: The formation and evolution of Titan’s winter polar vortex
Source: Nat Commun. 2017 Nov 21;8:1586. doi: 10.1038/s41467-017-01839-z (PMC5698511; doi:10.1038/s41467-017-01839-z)
Supplement: Supplementary file 3 — Supplementary Dataset 2 [file 41467_2017_1839_MOESM3_ESM.xlsx]

## Sheet: Sheet1
Supplementary data 2
Obs. Date	Year	Orbit	Latitude			FOV	sub-S.C. Lat.	sub-Sol. Lat.	N
			(degrees N)			(degrees)	(degrees N)	(degrees N)
2004-07-02	2004.5	000	-83.4	to	-30	2.5	-58.4	-24.4	144-295
2004-12-12	2004.95	00B	-67.7	to	-30	2.7	-9.7	-23.1	19-97
2005-02-14	2005.12	003	-62.1	to	-30	2.6	-3.3	-22.5	16-83
2005-02-15	2005.13	003	-58.5	to	-30	2.2	0.5	-22.5	14-56
2005-04-01	2005.25	005	-58.5	to	-30	2.4	-2.7	-22	35-92
2005-08-22	2005.64	013	-67.2	to	-30	2.4	-8.5	-20.5	23-107
2005-10-28	2005.83	017	-57.9	to	-30	2.5	0.3	-19.8	20-77
2005-10-27	2005.82	017	-58	to	-30	3.7	-0.4	-19.8	42-133
2006-01-14	2006.04	020	-57.8	to	-30	2.6	-0.3	-18.9	29-92
2006-05-21	2006.39	024	-57	to	-30	2.9	0.2	-17.3	10-105
2006-07-02	2006.5	025	-57.4	to	-30	3	0.4	-16.7	19-57
2006-09-06	2006.69	028	-48.5	to	-30	3	8.6	-15.8	31-78
2006-09-22	2006.73	029	-46.9	to	-30	2.9	12.3	-15.6	12-54
2006-09-22	2006.73	029	-47.8	to	-30	5.6	11.6	-15.6	32-109
2006-10-08	2006.77	030	-37.5	to	-30	2.8	20.8	-15.4	53-133
2006-10-24	2006.81	031	-31.9	to	-30	5.4	27.7	-15.2	30
2007-01-13	2007.04	037	-83.4	to	-30	2.3	-49.9	-14	34-74
2007-01-29	2007.08	038	-83.1	to	-30	2.4	-55.4	-13.8	105-183
2007-01-30	2007.08	038	-83.1	to	-30	5.1	-54.1	-13.8	85-187
2007-03-09	2007.19	040	-83.3	to	-39	2.1	-49.1	-13.3	47-217
2007-03-25	2007.23	041	-83.5	to	-30	2.2	-42.8	-13.1	96-201
2007-04-28	2007.32	043	-37.3	to	-30	4.5	21.7	-12.6	12-44
2007-05-12	2007.36	044	-81.2	to	-30	2.1	-21.1	-12.4	11-117
2007-05-13	2007.37	044	-42.3	to	-30	2.2	14.9	-12.3	26-72
2007-05-13	2007.37	044	-43.2	to	-30	4.3	14.2	-12.3	30-61
2007-07-18	2007.55	048	-57.6	to	-30	3.4	0.4	-11.4	23-90
2007-07-17	2007.54	048	-56	to	-30	6.7	0.3	-11.4	10-54
2007-08-31	2007.67	049	-61.8	to	-30	2.9	-3.4	-10.7	15-73
2007-10-02	2007.76	050	-57.3	to	-30	3	1.8	-10.2	18-103
2007-10-03	2007.76	050	-57.3	to	-30	6.5	1.9	-10.2	27-177
2007-10-21	2007.81	051	-42.6	to	-30	3.3	15.3	-10	71-184
2007-11-19	2007.89	052	-52.9	to	-30	2.9	4.9	-9.5	45-140
2007-11-17	2007.88	052	-61.9	to	-30	4.6	-2.1	-9.6	12-93
2007-12-05	2007.93	053	-47	to	-30	3.1	11.5	-9.3	59-216
2008-01-06	2008.02	055	-37.4	to	-30	2.9	21.4	-8.8	36-107
2008-01-04	2008.01	055	-77.3	to	-30	4.3	-17.9	-8.8	16-173
2008-02-23	2008.15	059	-32.3	to	-30	3.3	26.1	-8.1	14
2008-02-23	2008.15	059	-32.7	to	-30	4.2	26	-8.1	23-49
2008-02-23	2008.15	059	-32.8	to	-30	4.9	25.8	-8.1	14
2008-05-13	2008.37	067	-31.8	to	-30	3.2	28.1	-6.9	34
2008-05-27	2008.41	069	-82.8	to	-30	3.1	-27.5	-6.6	22-99
2008-07-30	2008.58	078	-83.5	to	-30	2.6	-27.1	-5.7	26-143
2008-12-20	2008.97	097	-83.1	to	-30	2.6	-38.5	-3.4	68-137
2009-03-26	2009.24	106	-83.7	to	-30	2.5	-52.4	-2	85-158
2009-05-22	2009.39	111	-83.3	to	-30	2.8	-49.4	-1.1	127-231
2009-06-23	2009.48	113	-83.9	to	-30	2.8	-34.9	-0.6	91-222
2009-07-23	2009.56	115	-32.6	to	-30	2.2	26.3	-0.1	23
2009-10-11	2009.78	119	-52.1	to	-30	2.2	6.3	1.1	26-101
2009-12-12	2009.95	122	-58.6	to	-30	2.4	-1.3	2.1	22-68
2010-05-19	2010.38	131	-58.2	to	-30	2.6	-0.6	4.4	20-67
2010-05-20	2010.39	131	-52.2	to	-30	2.3	5.4	4.4	14-49
2011-02-17	2011.14	145	-57	to	-30	2.4	0	8.4	68-230
2011-02-19	2011.14	145	-56.8	to	-30	2.3	-0.1	8.4	43-154
2011-05-09	2011.36	148	-57.6	to	-30	3	-0.1	9.6	30-100
2011-06-21	2011.48	149	-58.1	to	-30	3	0	10.2	29-113
2011-09-11	2011.7	153	-57.5	to	-30	2.5	0.2	11.3	50-169
2012-02-18	2012.14	161	-57.9	to	-30	2.2	-0.4	13.4	45-138
2012-06-07	2012.44	167	-72.1	to	-30	2.7	-13.6	14.8	35-309
2012-07-23	2012.57	169	-43.1	to	-30	2.7	14.3	15.3	42-68
2012-09-27	2012.75	172	-83.3	to	-30	3.3	-30.5	16.1	104-464
2012-11-29	2012.92	175	-83.3	to	-30	3	-38.4	16.9	167-856
2013-02-17	2013.14	181	-82.7	to	-30	2.5	-41.9	17.7	159-1058
2013-04-06	2013.27	185	-83.6	to	-30	2.5	-39.7	18.2	109-921
2013-05-24	2013.4	190	-83.5	to	-30	2.8	-47.7	18.8	81-310
2014-01-02	2014.01	200	-82.9	to	-44.4	2	-65.4	20.9	10-596
2014-02-03	2014.1	201	-83.1	to	-30	2.4	-58.2	21.2	174-288
2014-03-07	2014.19	202	-83.5	to	-30	2.3	-51.1	21.5	203-670
2014-04-08	2014.27	203	-83.7	to	-30	2.6	-42.6	21.8	206-760
2014-05-16	2014.38	204	-83.2	to	-30	3	-41.1	22.1	73-157
2014-06-17	2014.47	205	-83.3	to	-30	2.6	-47	22.3	177-630
2014-07-19	2014.56	206	-83.4	to	-30	2.5	-52.5	22.6	77-486
2014-08-20	2014.64	207	-83.3	to	-30	2.6	-54.8	22.8	129-413
2014-09-21	2014.73	208	-83	to	-30	2.5	-46	23.1	150-607
2014-10-23	2014.82	209	-83	to	-30	2.5	-38.1	23.3	96-668
2014-12-10	2014.95	210	-83.7	to	-30	2.4	-31.4	23.6	53-331
2014-12-11	2014.95	210	-33	to	-30	2.3	24.8	23.6	57-104
2015-02-13	2015.13	212	-51.9	to	-30	2.6	7.2	24.1	21-116
2015-03-15	2015.21	213	-62.7	to	-30	2	-5.5	24.3	34-222
2015-03-17	2015.21	213	-57	to	-30	2.6	0.9	24.3	36-152
2015-05-07	2015.35	215	-57.7	to	-30	2.3	0.1	24.6	41-162
2015-07-07	2015.52	218	-53.4	to	-30	2.2	-0.3	24.9	13-110
2015-09-29	2015.75	222	-52.2	to	-30	2.3	0	25.3	23-85
2015-11-12	2015.87	225	-57.4	to	-30	2.8	-0.1	25.5	82-291
2016-02-17	2016.14	232	-45.8	to	-30	1.8	15.2	25.9	10-151
2016-04-03	2016.27	234	-76	to	-30	2.9	-15.6	26.1	10-545
2016-05-05	2016.35	235	-82.2	to	-30	2.7	-24.2	26.2	27-800
2016-09-26	2016.75	243	-83.6	to	-30	2.3	-38.8	26.5	63-493
2016-11-13	2016.88	248	-83.5	to	-44.9	2.4	-35.1	26.6	30-282
2017-02-01	2017.1	259	-83	to	-30	2.1	-37.9	26.7	110-742
2017-02-02	2017.1	259	-61.5	to	-30	2.4	-5.8	26.7	18-226
2017-04-21	2017.31	270	-82.4	to	-33.8	2.4	-24.8	26.7	48-390
2017-04-22	2017.32	270	-42.1	to	-30	2.7	17.3	26.7	45-189
2017-05-24	2017.4	275	-52.7	to	-30	2.3	4.5	26.7	26-103
Cassini/CIRS nadir mapping observations.
All data have a spectral resolution of 2.5 cm-1.
Latitudes are reprojected to 150 km altitude and analysis is restricted to 30--90 degrees S.
FOV is field of view size in degrees of latitude for an individual FP3/4 pixel projected onto Titan's disc.
Sub-spacecraft and sub-solar latitudes evolve throughout the mission and are plotted in Figure 1.
N is the number of spectra in each 10 degree latitude bin.
Typically the polar bins contain the least spectra due to the smaller available area of the polar region compared to low latitudes.
